# Supplementary figures and images for: A copolymer capsule with a magnetic core for hydrophilic or hydrophobic drug delivery via thermo-responsive stimuli or carrier biodegradation
Source: Royal Society of Chemistry journal article supplement (doi:10.1039/c5ra27839b), 2016-01-01

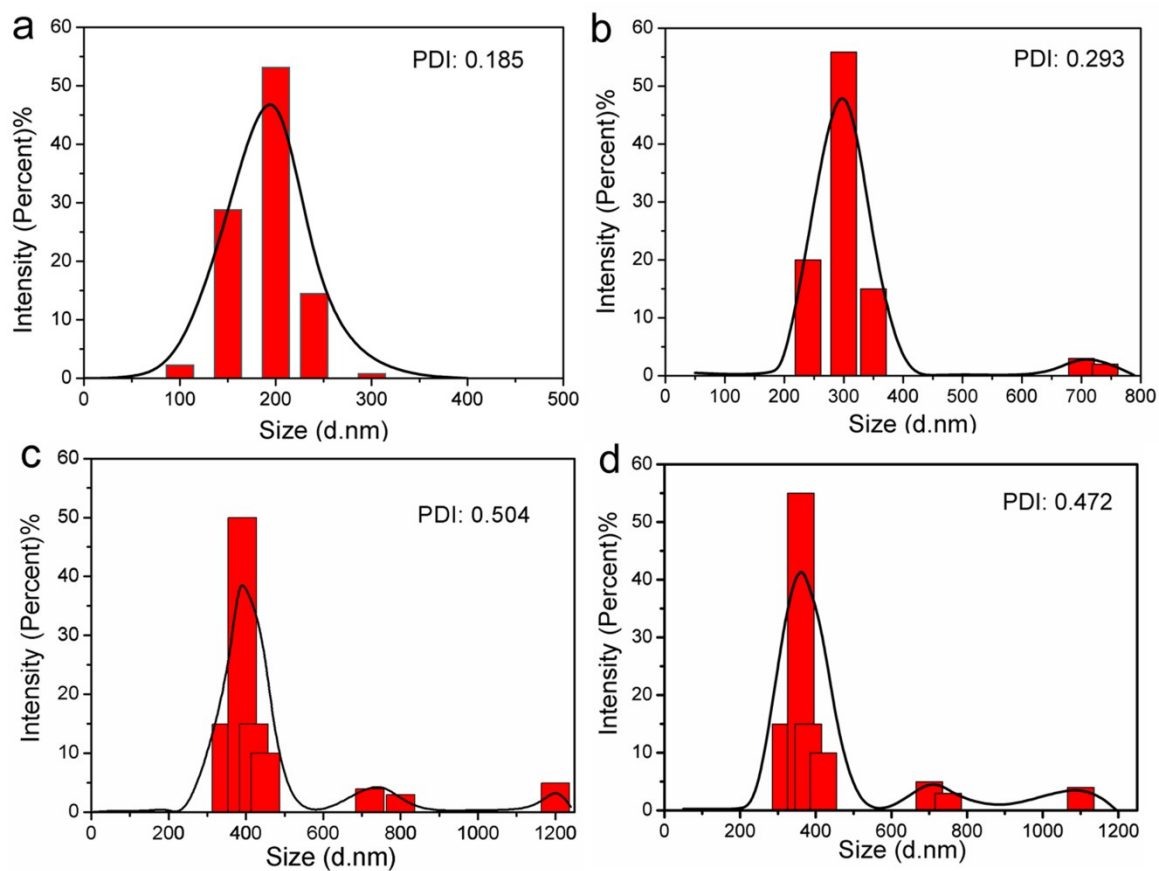

Fig. S1

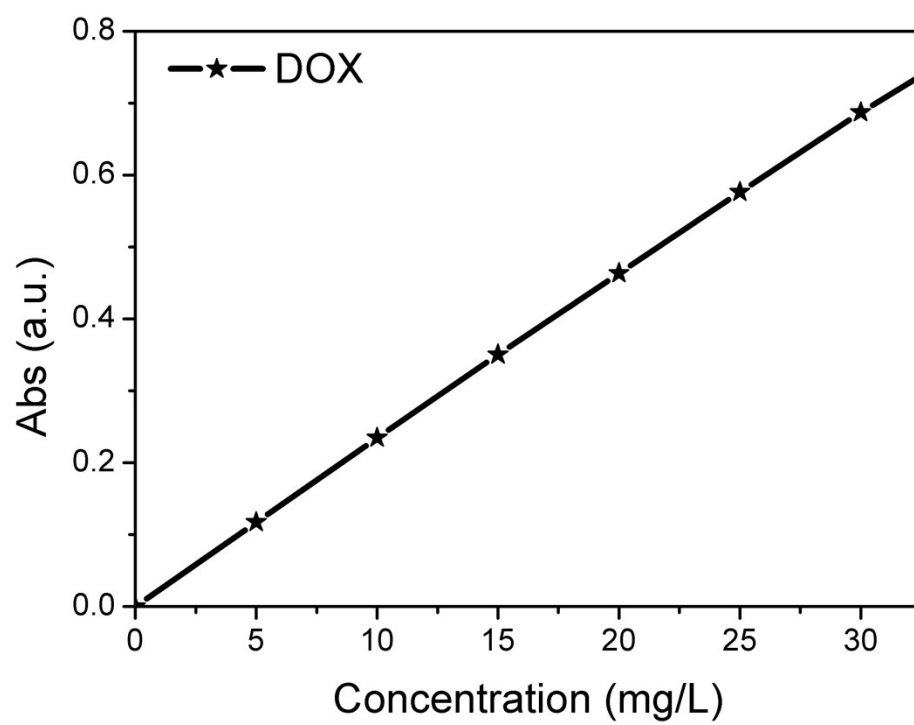

Fig. S2

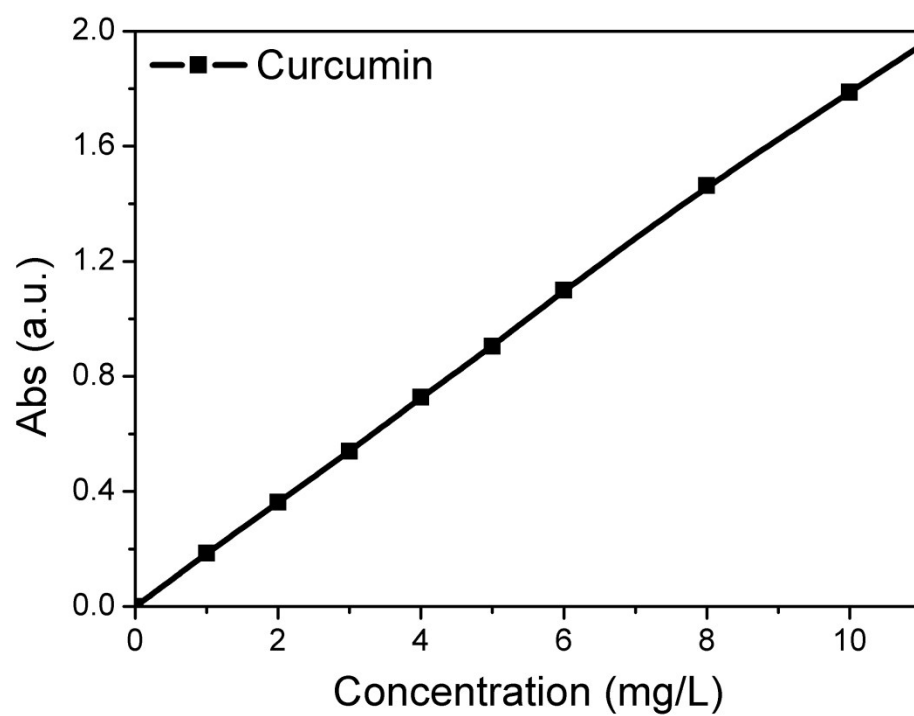

Fig. S3

Supplement: c5ra27839b1.pdf [file c5ra27839b1.pdf]
